# Supplementary material for: Unraveling the crucial role of spacer ligands in tuning the contact properties of metal–2D perovskite interfaces
Source: Royal Society of Chemistry journal article supplement (doi:10.1039/d1tc01520f), 2021-01-01
Supplement: d1tc01520f1.pdf [file d1tc01520f1.pdf]

## **Electronic Supplementary Information**

### **Unraveling The Crucial Role of Spacer Ligand in Tuning Contact Properties in Metal–2D Perovskite Interfaces**

Zhuo Xu<sup>a\*</sup>, Ming Chen<sup>d</sup> and Shengzhong Frank Liu<sup>a,b,c\*</sup>

<sup>a</sup>Key Laboratory of Applied Surface and Colloid Chemistry, National Ministry of Education; Shaanxi Key Laboratory for Advanced Energy Devices; Shaanxi Engineering Lab for Advanced Energy Technology; Institute for Advanced Energy Materials; School of Materials Science and Engineering, Shaanxi Normal University, Xi'an 710119, China.

<sup>b</sup>Dalian National Laboratory for Clean Energy; Dalian Institute of Chemical Physics, Chinese Academy of Sciences, Dalian 116023, China.

<sup>c</sup>University of the Chinese Academy of Sciences, Beijing 100039, China.

<sup>d</sup>College of Physics and Electronics Engineering, School of Electric Power, Civil Engineering and Architecture, State Key Laboratory of Quantum Optics and Quantum Optics Devices, Shanxi University, Taiyuan, China, 030006.

\*E-mail: xuzh@snnu.edu.cn (Z.X.)

\*E-mail: szliu@dicp.ac.cn (S.L.)

## METHODS

In this study, the DFT calculations were performed using the Vienna Ab initio Simulation Package (VASP). The projected augmented wave (PAW) pseudopotentials and the PBEsol exchange-correlation functional within the generalized gradient approximation (GGA) were employed. An energy cutoff of 500 eV was set for the plane-wave function's expansion. The van der Waals (vdW) dispersion correction was found necessary to yield more accurate lattice constants, which are described by the DFT-D3 correction. The optimization of the bulk  $\text{PEA}_2\text{PbI}_4$  lattice structure is performed by applying Monkhorst-Pack sampling with a  $\Gamma$ -centered  $5\times5\times3$  k-point grid. The lattice parameters and atomic positions of bulk  $\text{PEA}_2\text{PbI}_4$  were relaxed until the total energy changes were less than  $1.0\times10^{-5}$  eV and the maximum force component acting on each atom was less than  $0.01$  eV  $\text{\AA}^{-1}$ . Then, the slab models of monolayer  $\text{PEA}_2\text{PbI}_4$  are cleaved from the bulk structure along the stacking direction. While the initial unit structure of  $\text{PEA}_2\text{MAPb}_2\text{I}_7$  and  $\text{PEA}_2\text{MA}_2\text{Pb}_3\text{I}_{10}$  are constructed by appropriately placing the  $\text{PEA}^+$  ligands at both ends of two and three layers of corner-sharing  $\text{PbI}_6$  octahedra, respectively, which are obtained by cutting out tetragonal  $\text{MAPbI}_3$  unit cells along the  $[001]$  direction to reduce the number of  $\text{PbI}_6$  octahedra layers. For the contact simulation, a periodic boundary condition is applied along the in-plane direction, and a vacuum spacing  $>20$   $\text{\AA}$  is set along the direction perpendicular to the interface to avoid the interaction between periodic cells in the stacking direction. For the construction of metal- $\text{PEA}_2\text{PbI}_4$  interfaces, Al, Ag, Ir, Au, Pd, and Pt substrates that cover a wide range of WFs are used, forming a suitable system for a systematic study of the band level alignment in metal- $\text{PEA}_2\text{PbI}_4$  interfaces. To form better interfacial lattice matching and minimize the interfacial stress,  $2\times2\times1$  supercell of  $\text{PEA}_2\text{PbI}_4$  is matched with a  $3\sqrt{2}\times3\sqrt{2}\times1$  supercell of the metal $[001]$  slab. For consistence, the in-plane lattice constants of all metal- $\text{PEA}_2\text{MA}_{n-1}\text{Pb}_n\text{I}_{3n+1}$  ( $n = 1, 2, \text{ and } 3$ ) slabs are fixed in consistence with that of

PEA<sub>2</sub>PbI<sub>4</sub>. Thus, maximum tensile strains of 4.7% for Ir and compressive strain of 2.7% for Au are applied among the six metals, as shown in Table 1. A  $\Gamma$ -centered k-point sampling of  $2 \times 2 \times 1$  is used for contact calculation. All the contact structures are relaxed until the total energy and maximum force component acting on each atom are  $1.0 \times 10^{-5}$  eV and  $0.02 \text{ eV } \text{\AA}^{-1}$ , respectively.

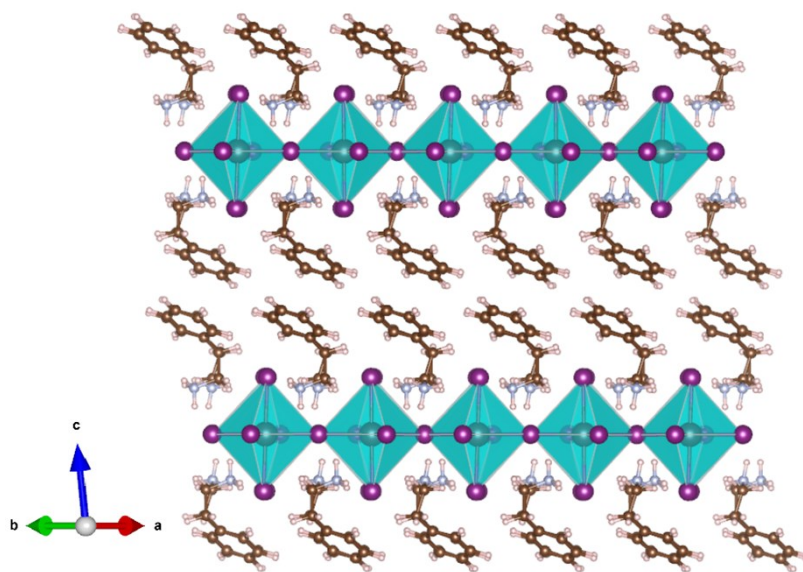

Fig. S1. Structural configurations of  $\text{PEA}_2\text{PbI}_4$ .

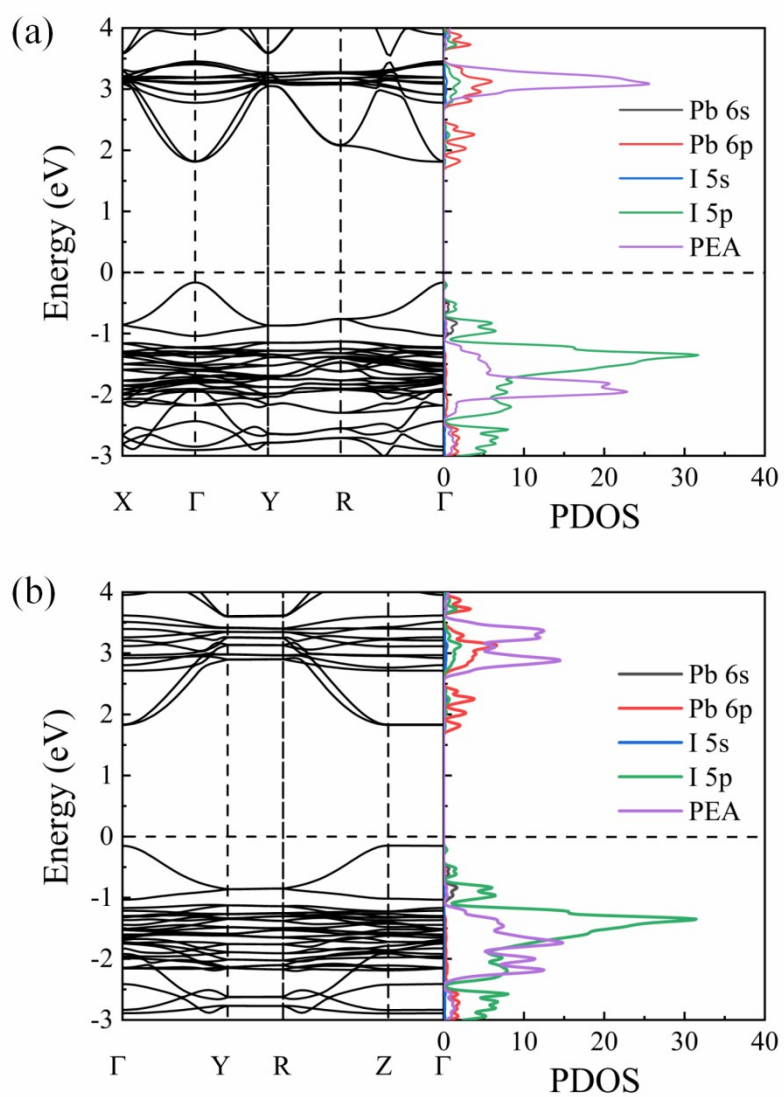

Fig. S2. Band structures and corresponding density of states for (a) bulk  $\text{PEA}_2\text{PbI}_4$  and (b) monolayer  $\text{PEA}_2\text{PbI}_4$ .

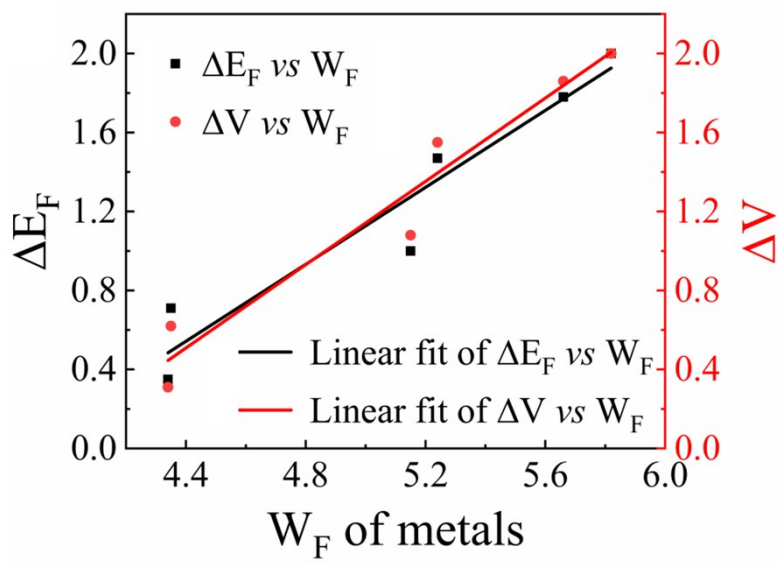

Fig. S3. Variation of potential step,  $\Delta V$ , and Fermi level shift,  $\Delta E_F$ , with  $W_F$  of metals.

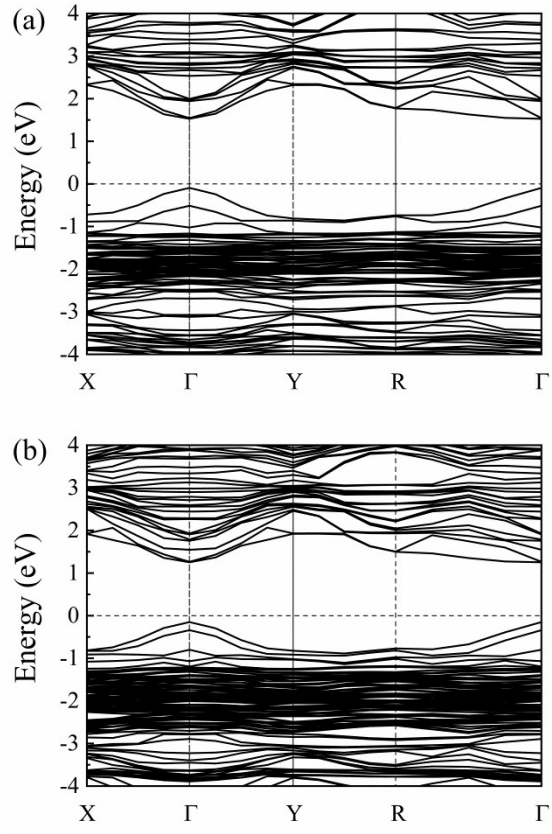

Fig. S4. Band structures of (a)  $\text{PEA}_2\text{MAPb}_2\text{I}_7$  and (b)  $\text{PEA}_2\text{MA}_2\text{Pb}_3\text{I}_{10}$ .

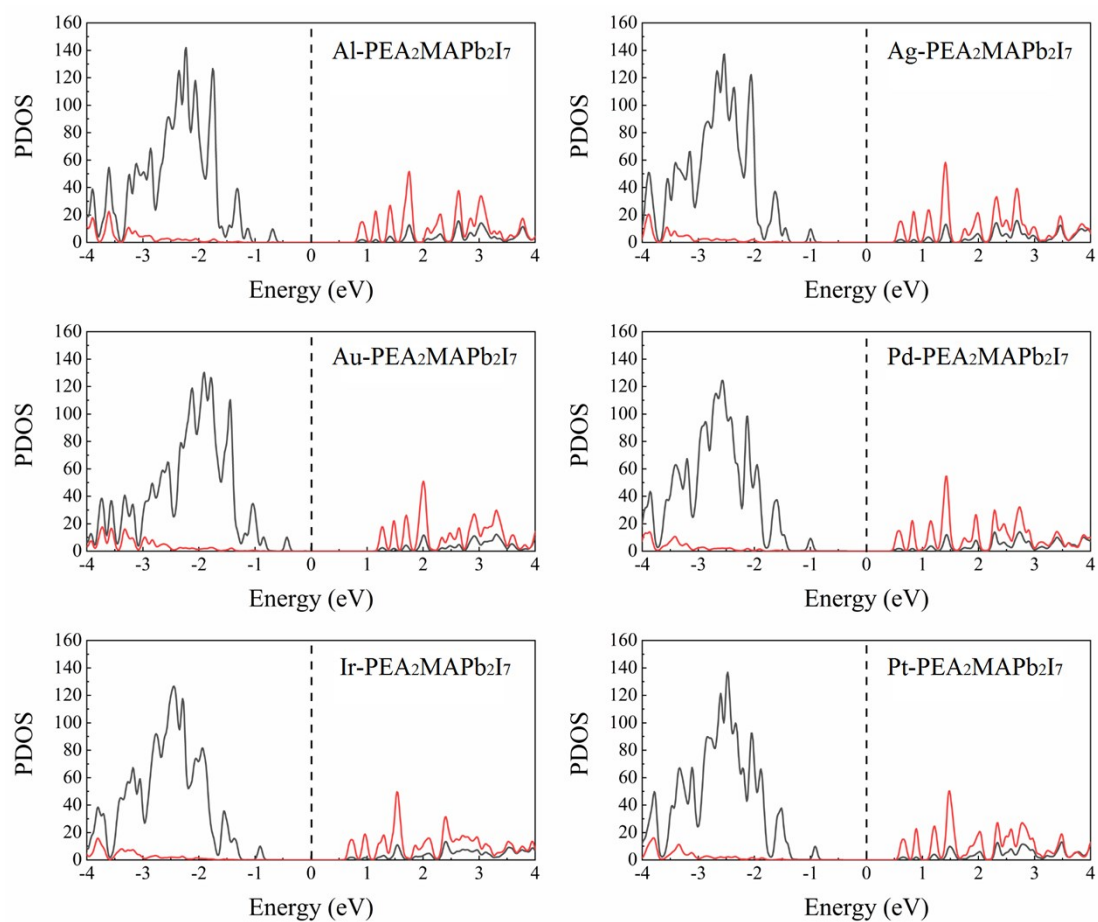

Fig. S5. Projected density of states for I 5p (dark line) and Pb 6p (red line) orbitals in all six metal-  $\text{PEA}_2\text{MAPb}_2\text{I}_7$  contacts.

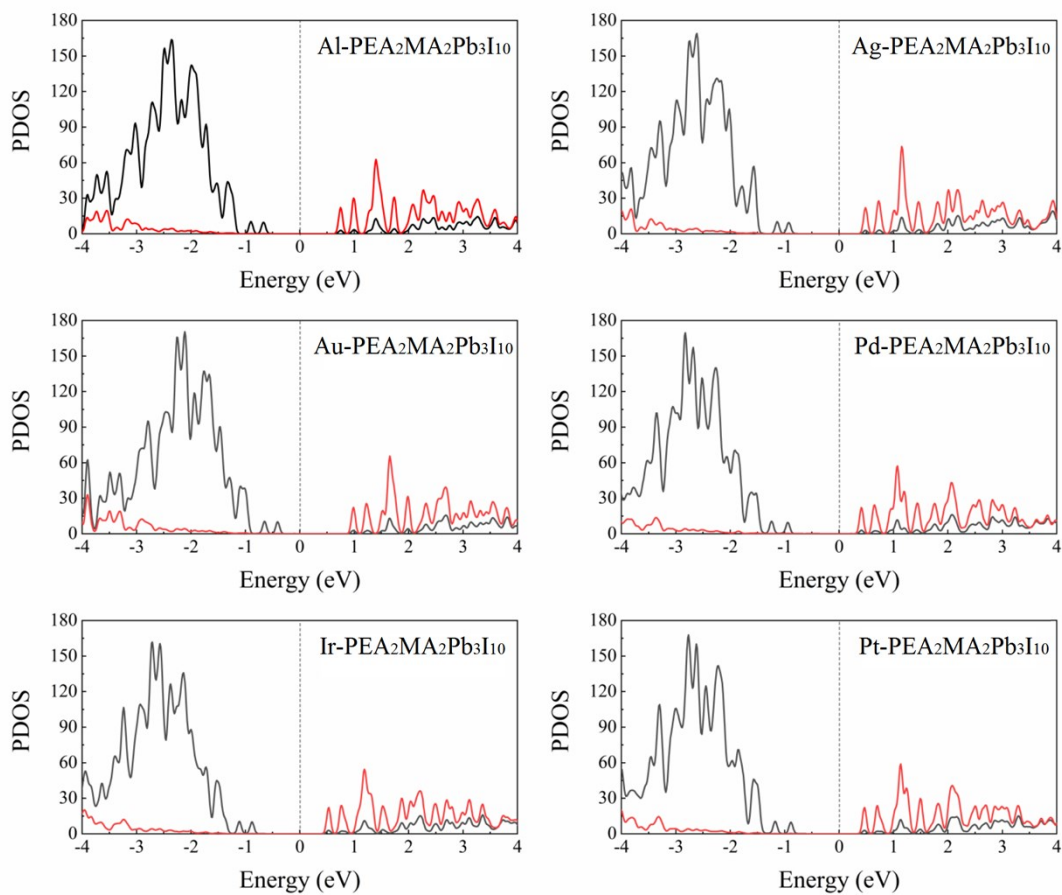

Fig. S6. Projected density of states for I 5p (dark line) and Pb 6p (red line) orbitals in all six metal-  $\text{PEA}_2\text{MA}_2\text{Pb}_3\text{I}_{10}$  contacts.

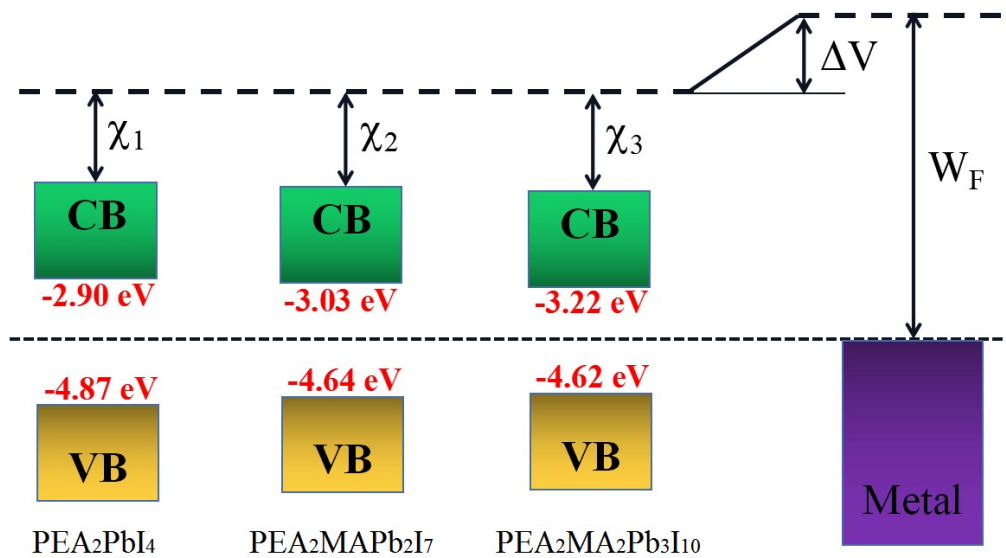

Fig. S7. Schematic illustration of the energy diagram at the interface of metal-PEA<sub>2</sub>PbI<sub>4</sub>, -PEA<sub>2</sub>MAPb<sub>2</sub>I<sub>7</sub>, and -PEA<sub>2</sub>MA<sub>2</sub>Pb<sub>3</sub>I<sub>10</sub>, with χ<sub>1</sub>, χ<sub>2</sub>, and χ<sub>3</sub> the electron affinities of PEA<sub>2</sub>PbI<sub>4</sub>, PEA<sub>2</sub>MAPb<sub>2</sub>I<sub>7</sub>, and PEA<sub>2</sub>MA<sub>2</sub>Pb<sub>3</sub>I<sub>10</sub>, respectively.
